# Supplementary material for: NLRP7 deubiquitination by USP10 promotes tumor progression and tumor-associated macrophage polarization in colorectal cancer
Source: PubMed Central journal article supplement (PMC8035766; doi:10.1186/s13046-021-01920-y), 2021-04-10

Figure 1B

1st

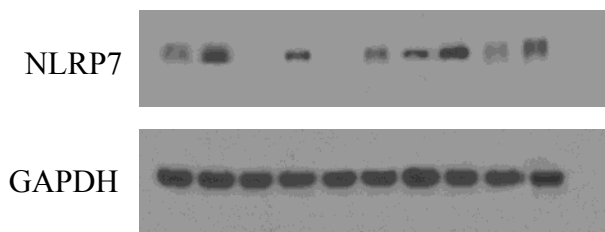

2nd

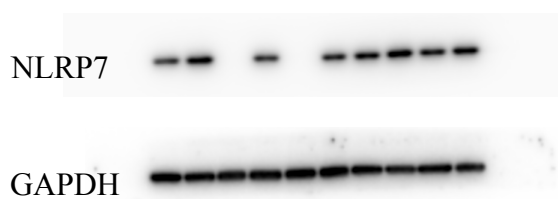

3rd

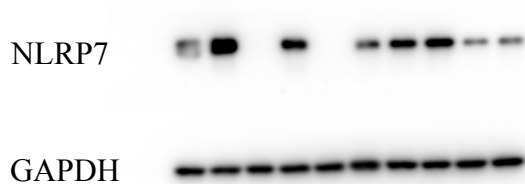

Figure 2B

1st

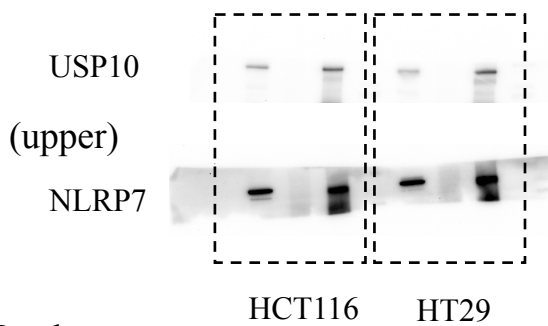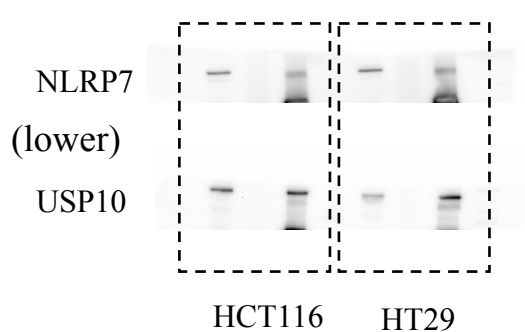

2nd

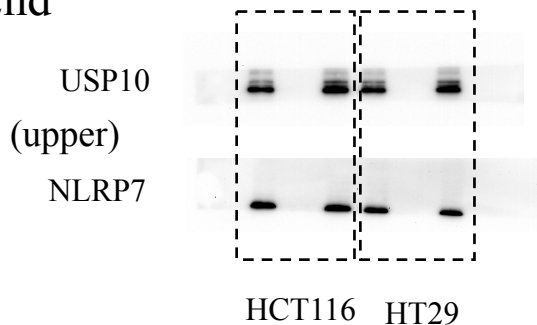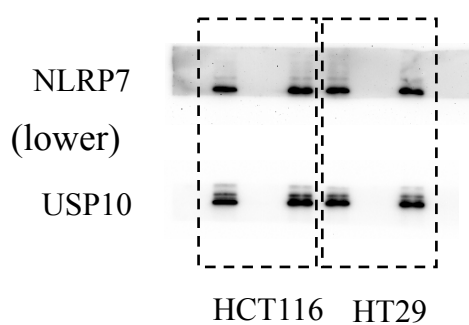

Figure 2B

3rd

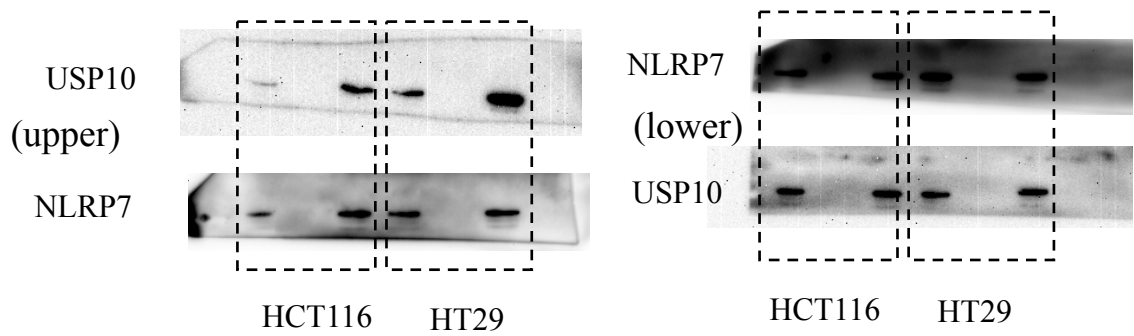

Figure 2E

1st

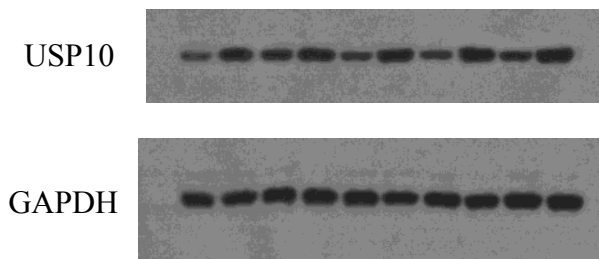

2nd

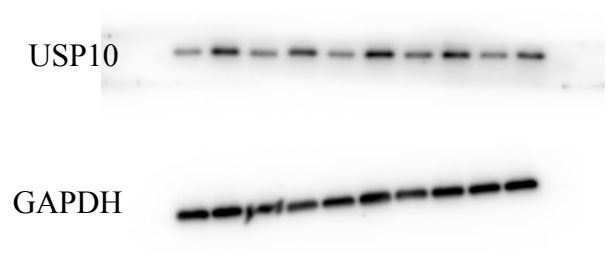

3rd

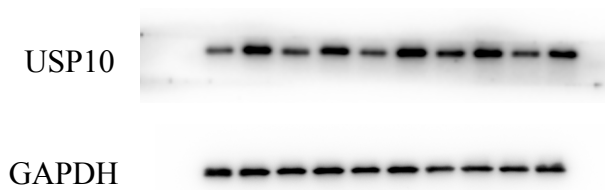



Figure 3D

1st

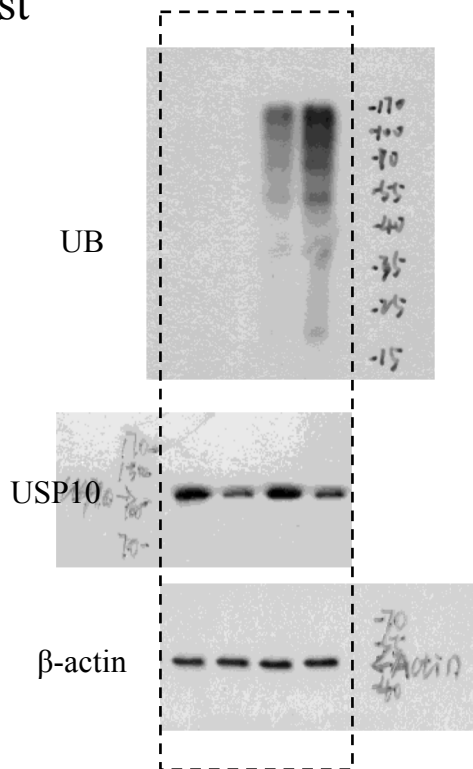

2nd

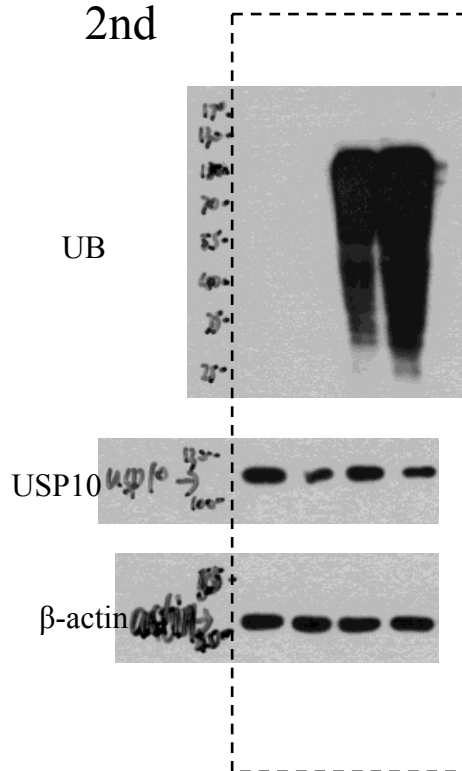

3rd

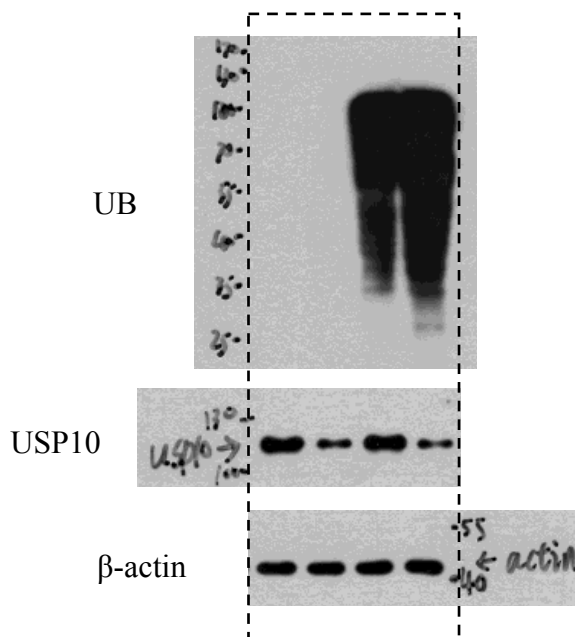





Figure 3F

2nd

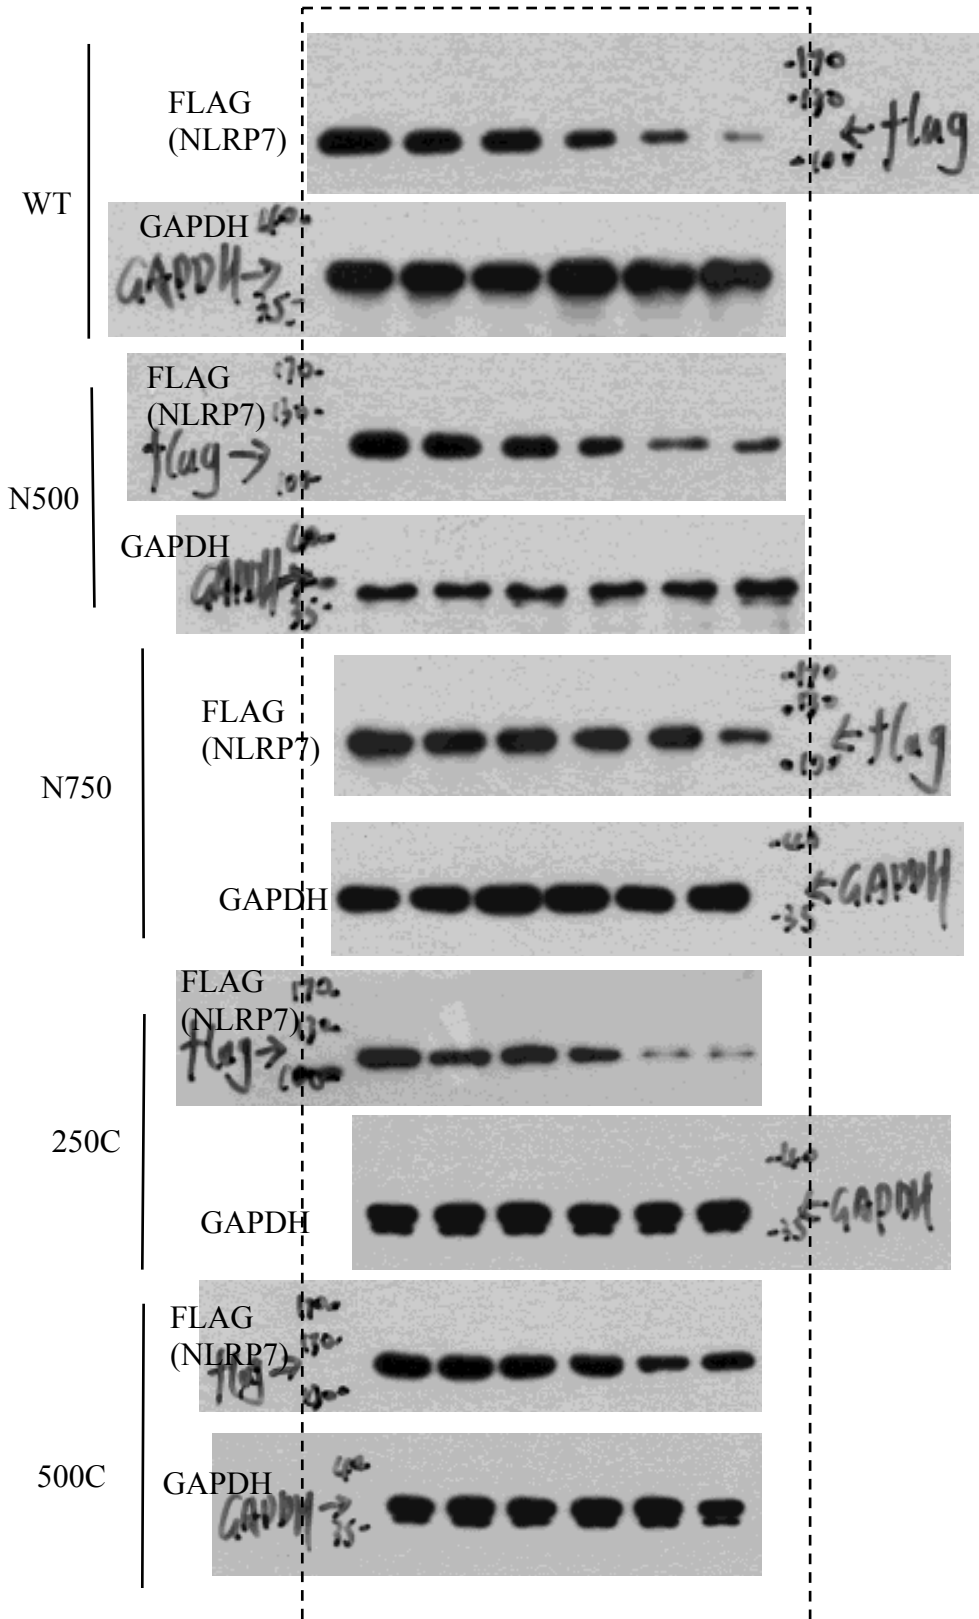

Figure 3F

3rd

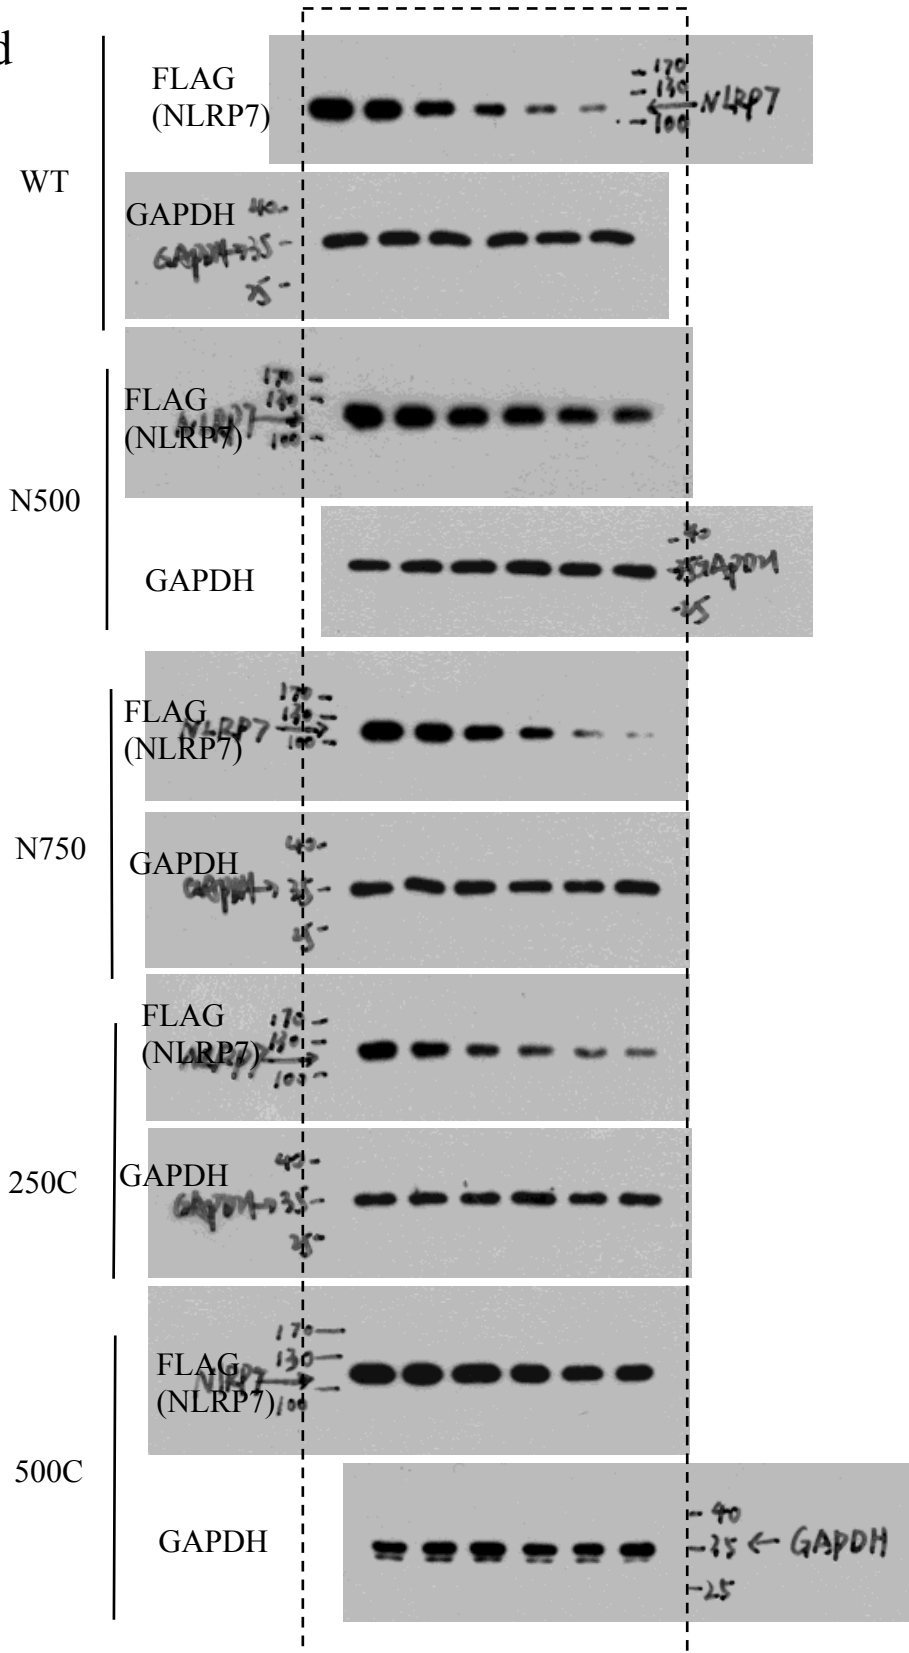

Figure 3H

1st

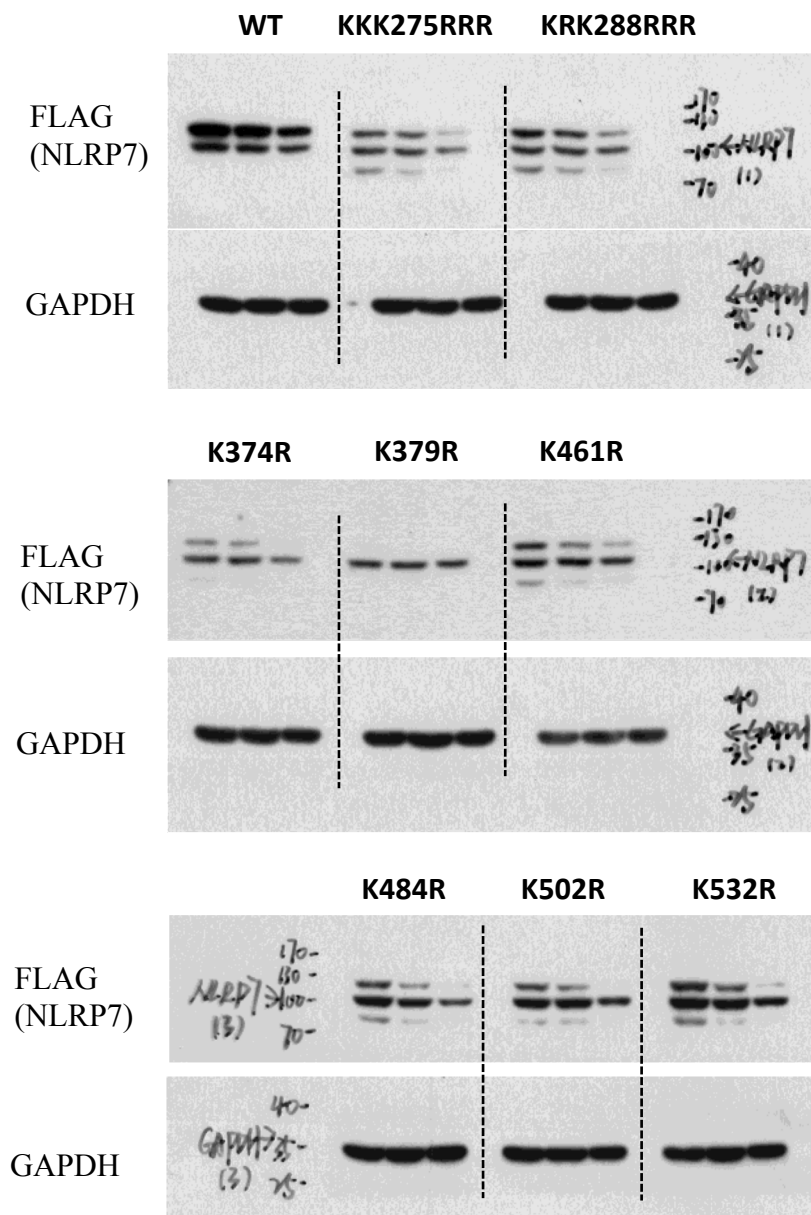

# Figure 3H

## 2nd

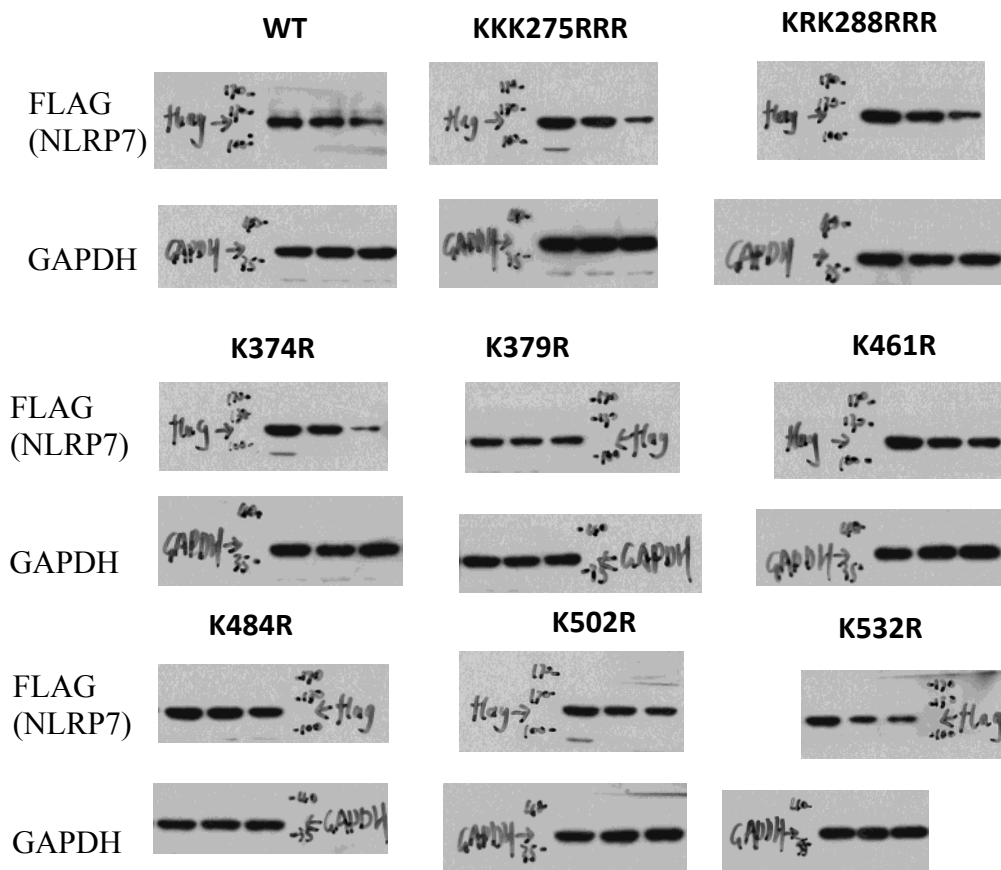

Figure 3H

3rd

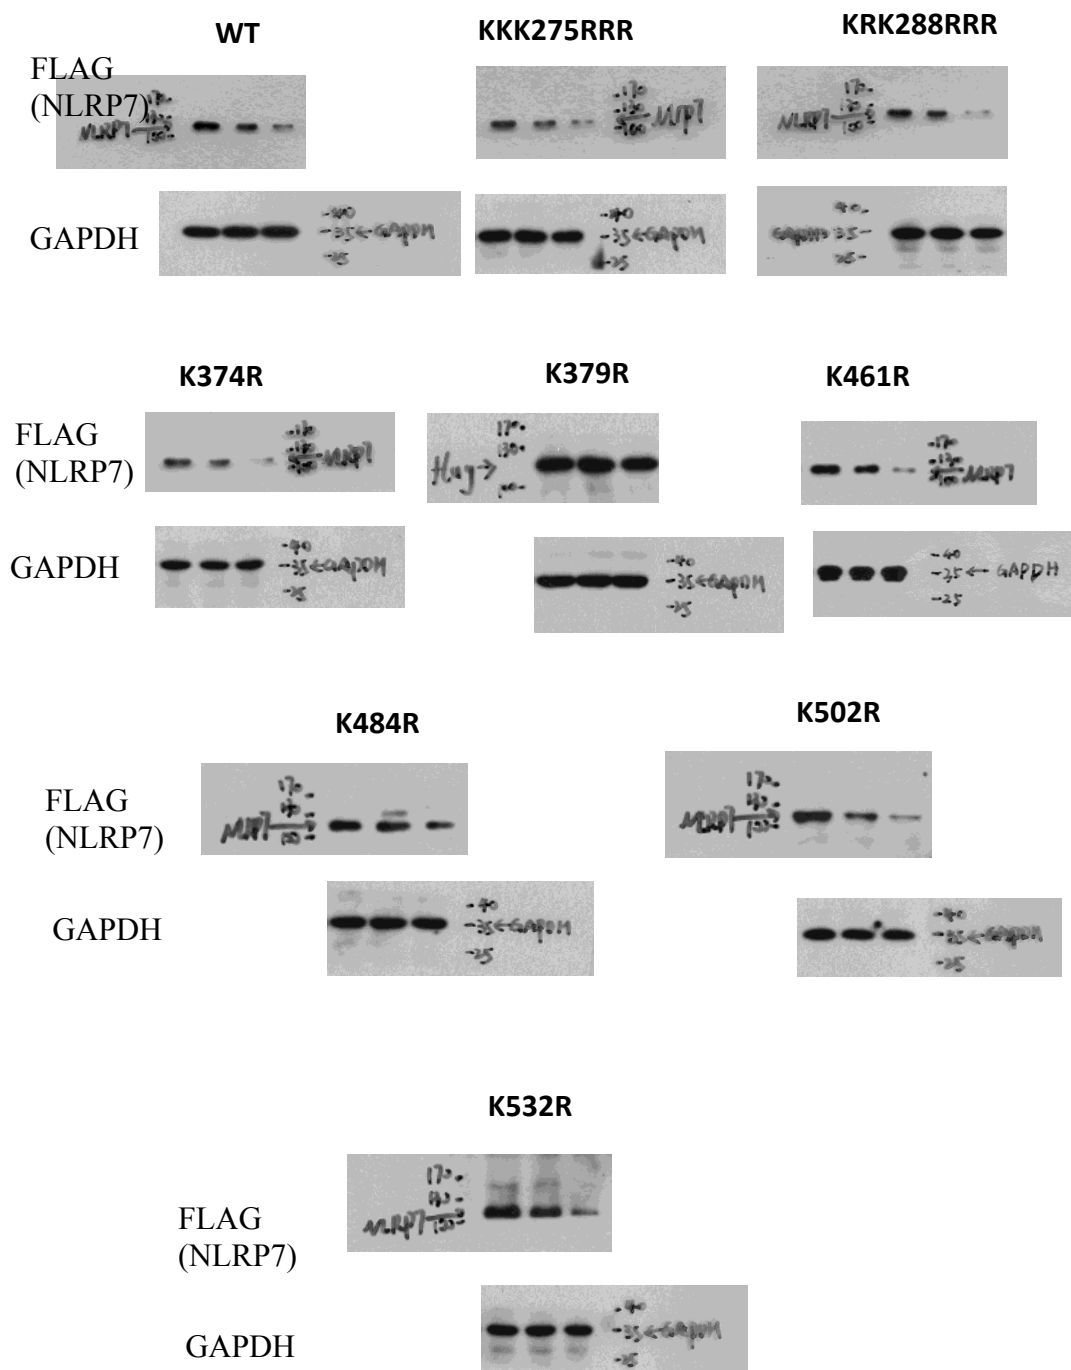

Figure 3J

1st

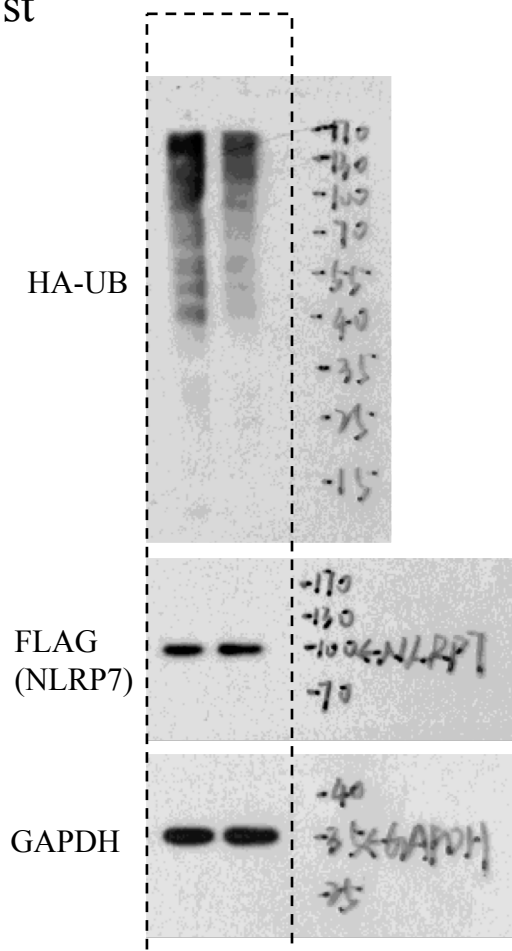

2nd

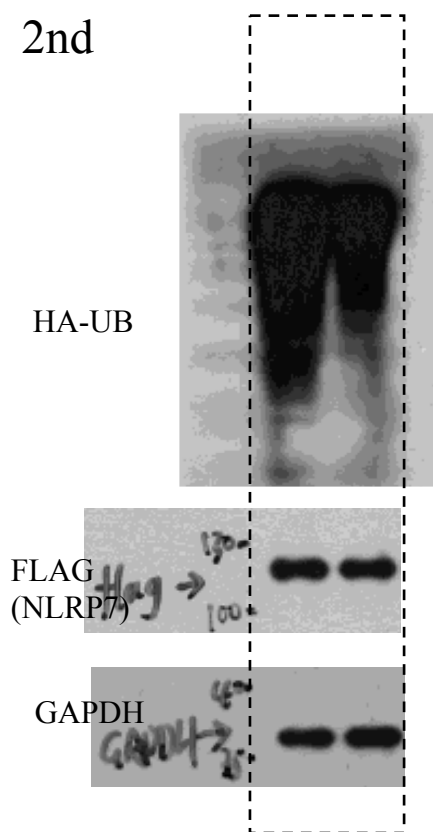

3rd

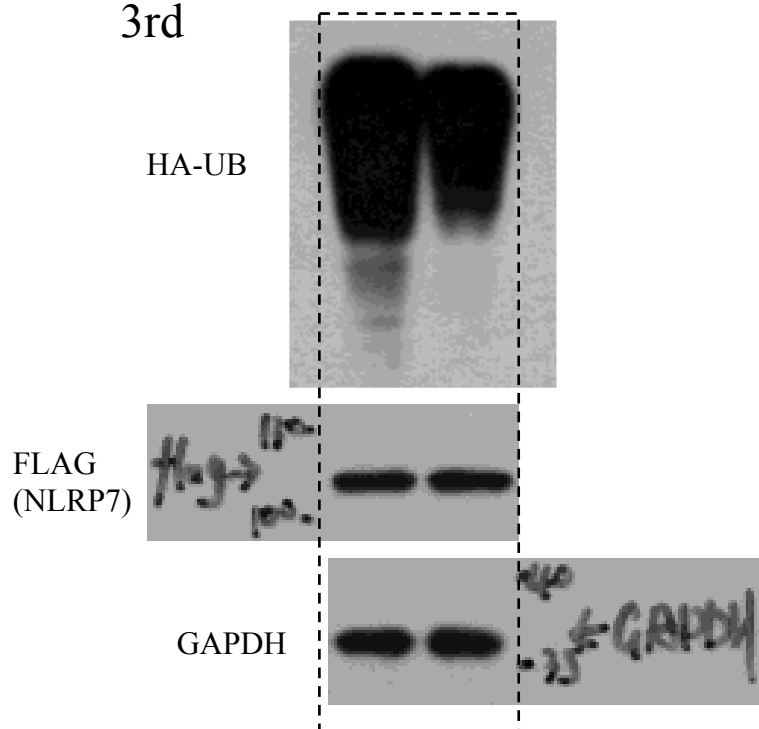

Figure 7A

1st

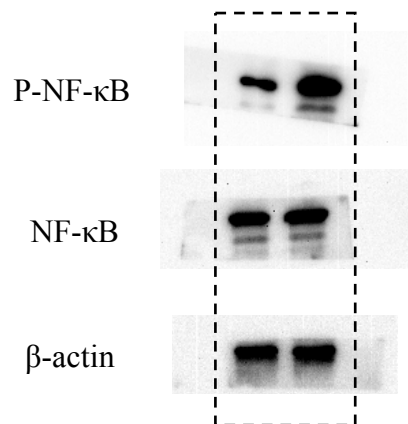

2nd

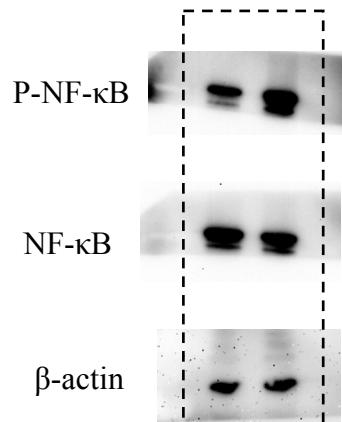

3rd

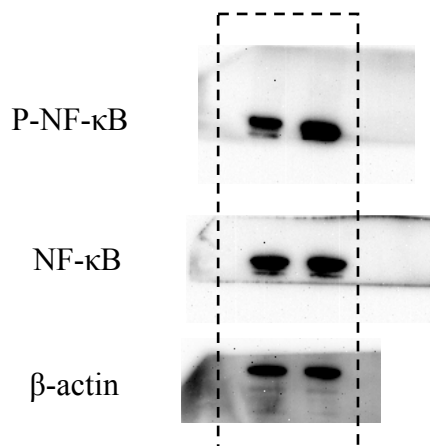

Supplement: 13046_2021_1920_MOESM2_ESM.pdf [file 13046_2021_1920_MOESM2_ESM.pdf]
