# Supplementary material for: NLRP7 deubiquitination by USP10 promotes tumor progression and tumor-associated macrophage polarization in colorectal cancer
Source: PubMed Central journal article supplement (PMC8035766; doi:10.1186/s13046-021-01920-y), 2021-04-10

# Figure S1

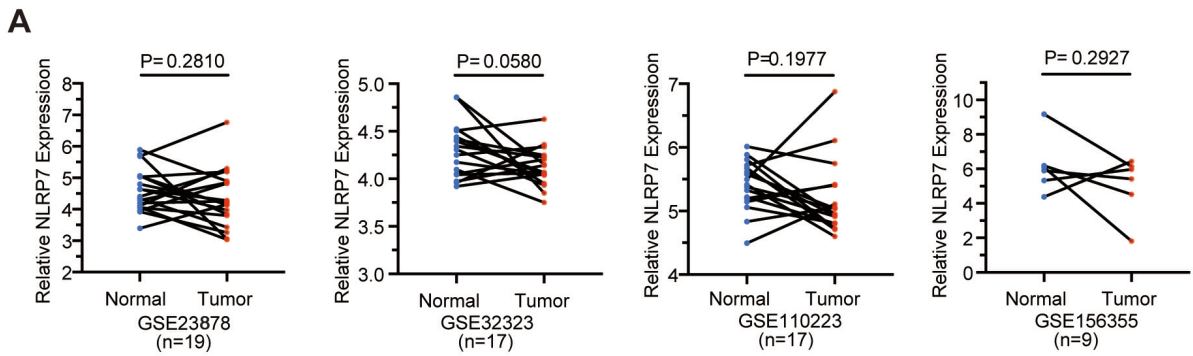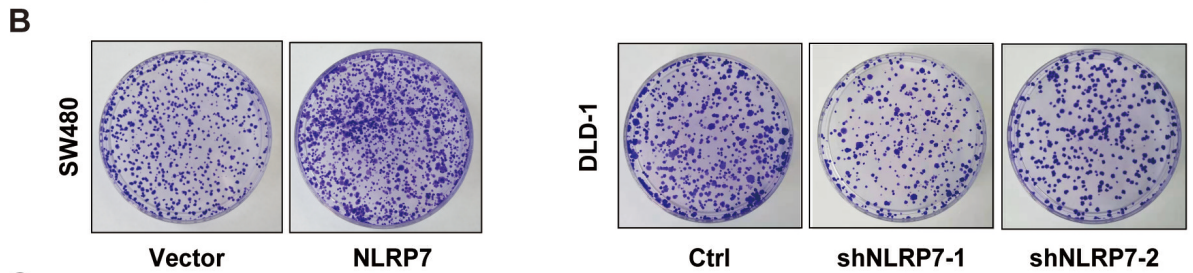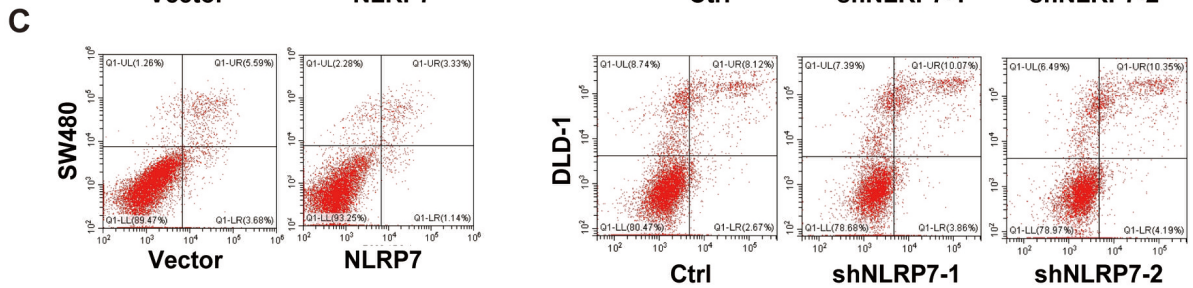

|            | Vector (SW480) |         |          | NLRP7 (SW480) |         |          |
|------------|----------------|---------|----------|---------------|---------|----------|
| Population | Events         | % Total | % Parent | Events        | % Total | % Parent |
| All Events | 10949          | 100.00% | 100.00%  | 11055         | 100.0%  | 100.00%  |
| P1         | 10000          | 91.33%  | 91.33%   | 10000         | 90.46%  | 90.46%   |
| Q1-UR      | 559            | 5.11%   | 5.59%    | 333           | 3.01%   | 3.33%    |
| Q1-UL      | 126            | 1.15%   | 1.26%    | 228           | 2.06%   | 2.28%    |
| Q1-LL      | 8947           | 81.72%  | 89.47%   | 9325          | 84.35%  | 93.25%   |
| Q1-LR      | 368            | 3.36%   | 3.68%    | 114           | 1.03%   | 1.14%    |

|            | Ctrl (DLD-1) |         |          | shNLRP7-1 (DLD-1) |         |          | sh-NLRP7-2 (DLD-1) |         |          |
|------------|--------------|---------|----------|-------------------|---------|----------|--------------------|---------|----------|
| Population | Events       | % Total | % Parent | Events            | % Total | % Parent | Events             | % Total | % Parent |
| All Events | 10645        | 100.00% | 100.00%  | 10641             | 100.0%  | 100.00%  | 10632              | 100.0%  | 100.00%  |
| P1         | 10000        | 93.94%  | 93.94%   | 10000             | 93.98%  | 93.98%   | 10000              | 94.06%  | 94.06%   |
| Q1-UR      | 812          | 7.63%   | 8.12%    | 1007              | 9.46%   | 10.07%   | 1035               | 9.73%   | 10.35%   |
| Q1-UL      | 874          | 8.21%   | 8.74%    | 739               | 6.94%   | 7.39%    | 649                | 6.10%   | 6.49%    |
| Q1-LL      | 8047         | 75.59%  | 80.47%   | 7868              | 73.94%  | 78.68%   | 7897               | 74.28%  | 78.97%   |
| Q1-LR      | 267          | 2.51%   | 2.67%    | 386               | 3.63%   | 3.86%    | 419                | 3.94%   | 4.19%    |

# Figure S2

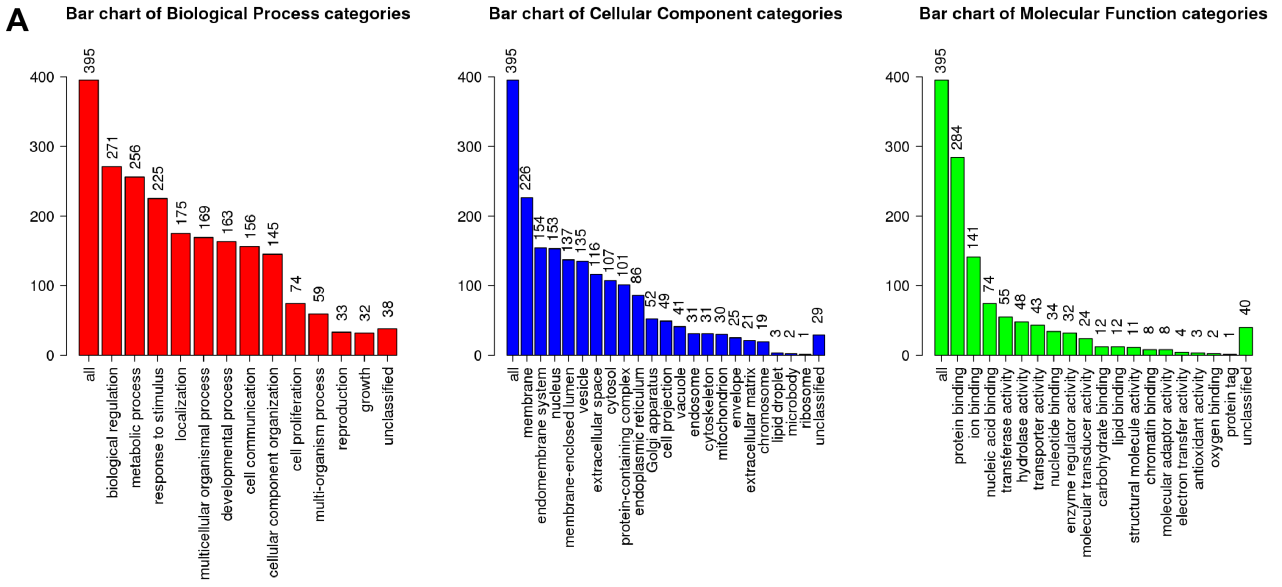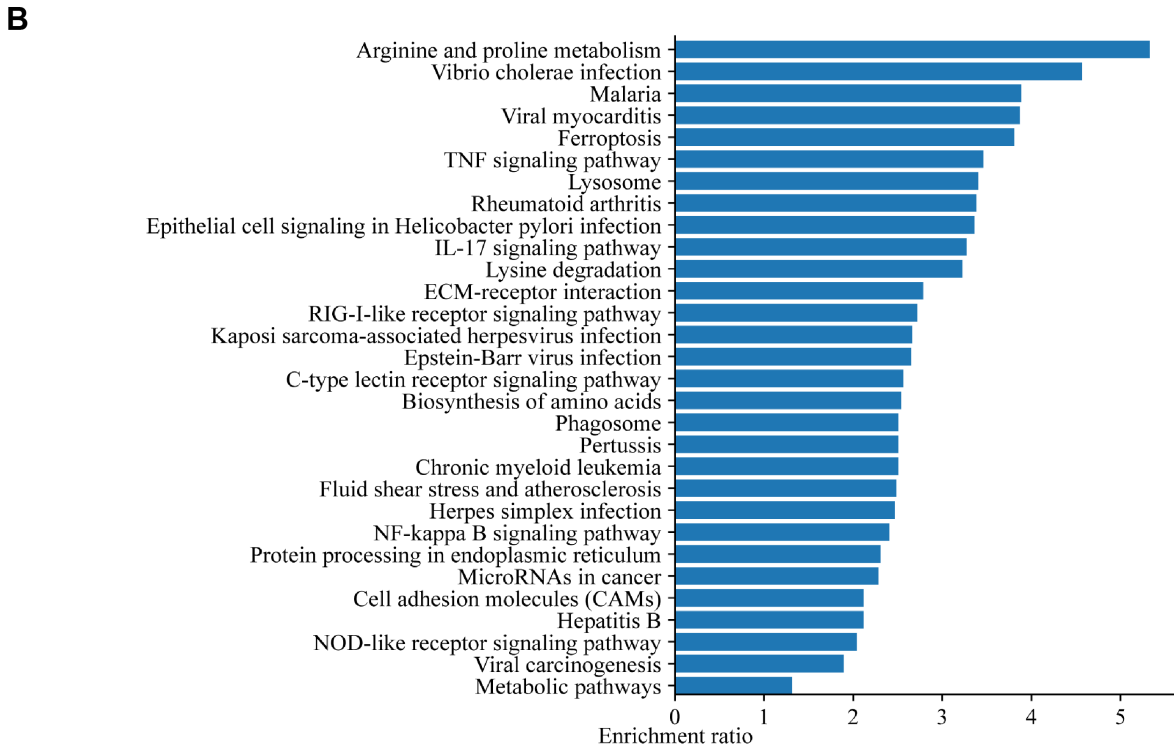

**Figure S3**

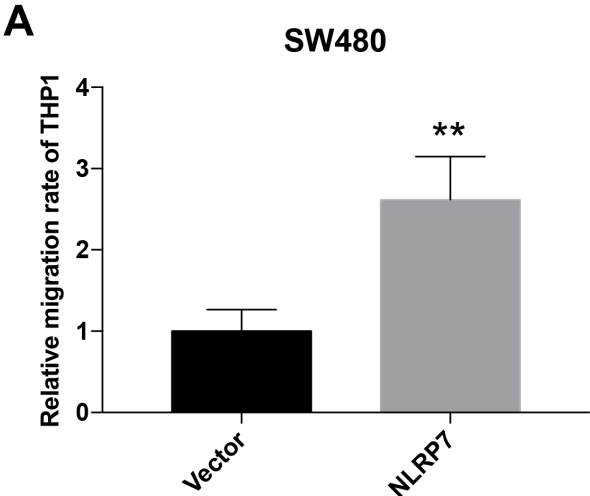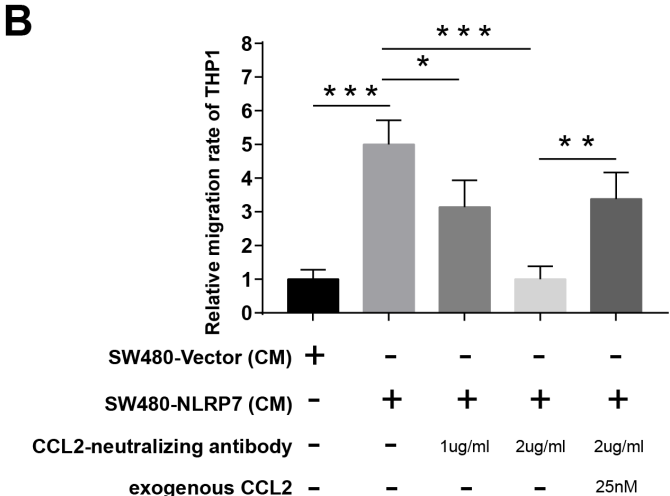

Supplement: 13046_2021_1920_MOESM3_ESM.pdf [file 13046_2021_1920_MOESM3_ESM.pdf]
